# Supplementary material for: Antimicrobial Susceptibility Profiles of Acinetobacter baumannii Strains, Isolated from Clinical Cases of Companion Animals in Greece
Source: MDPI journal article supplement (doi:10.3390/vetsci10110635), 2023-10-29
Supplement: s1 [file s1]

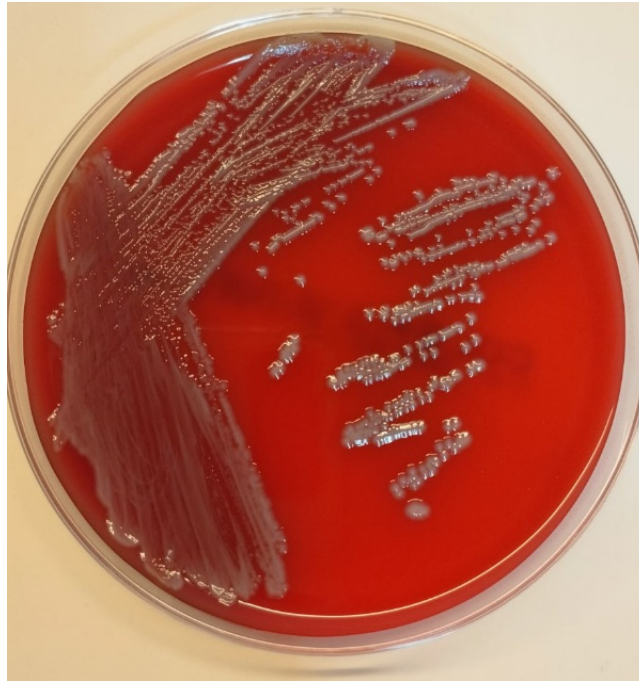

**Figure S1.** Growth of *Abc* complex strain (isolate number A4) on sheep blood agar.

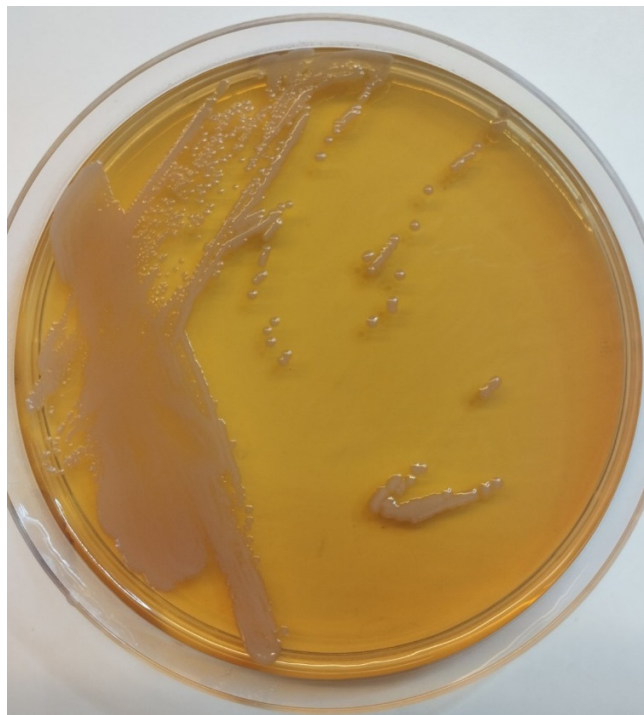

**Figure S2.** Growth of *Abc* complex strain (isolate number A4) on McConkey agar.

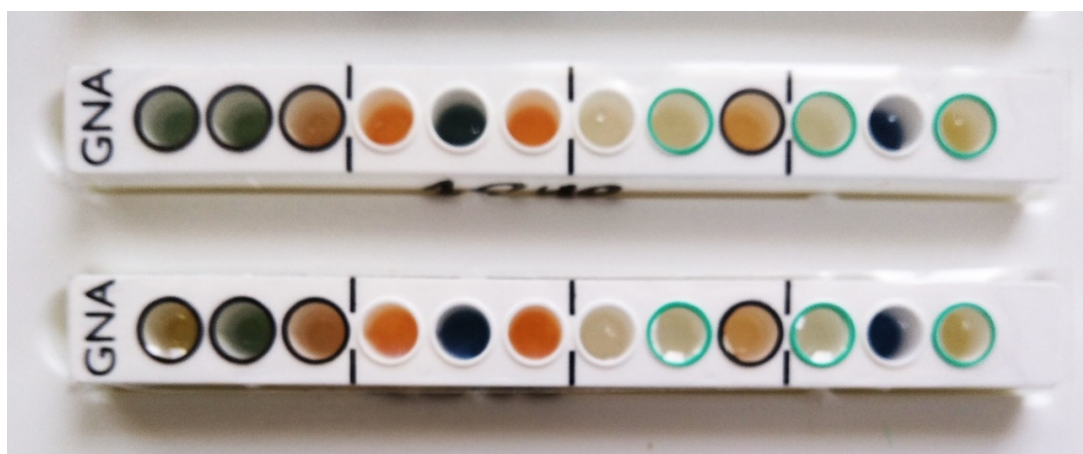

**Figure S3.** Biochemical tests of *Abc* complex strains (up: isolate number A6 , down: isolate number A7) using Microgen GNA-ID System, Microgen Bioproducts Ltd.

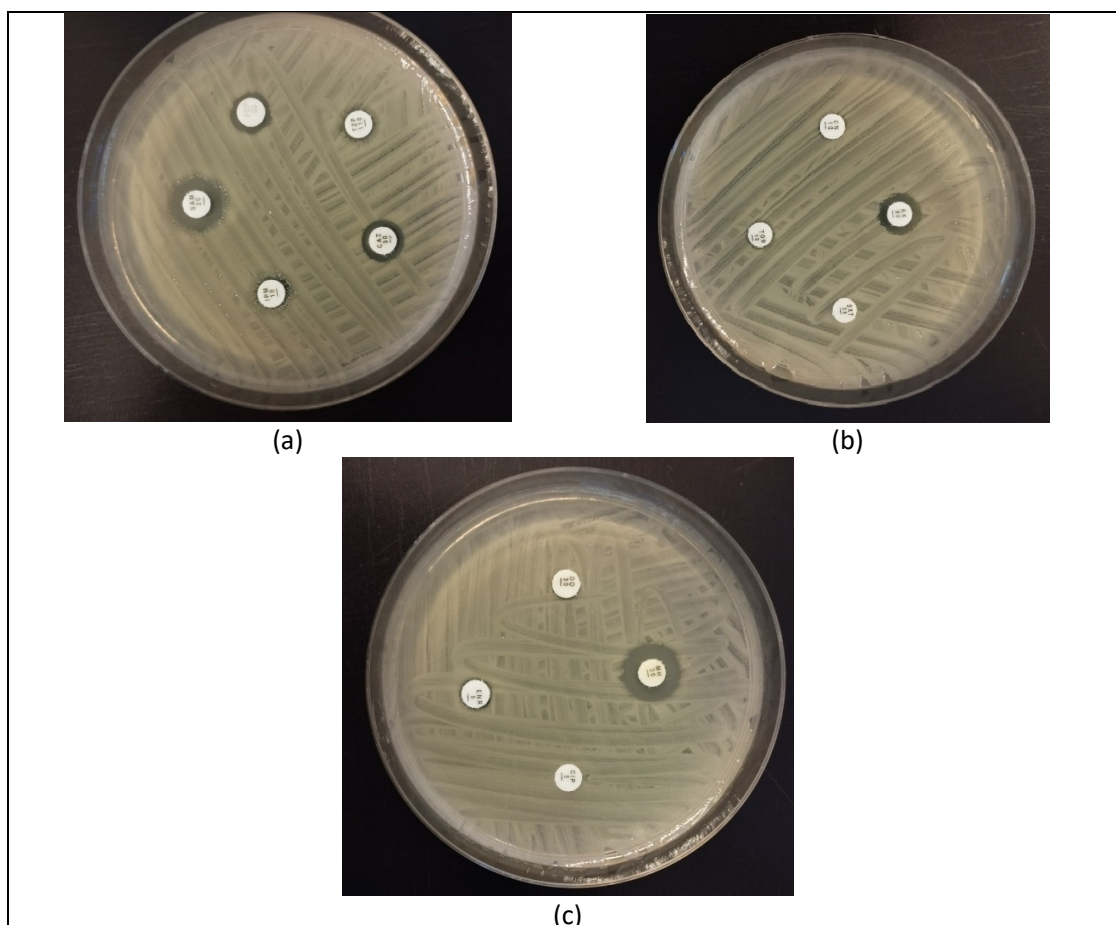

**Figure S4.** Petri dishes of Disc Diffusion Test. [(a) SAM: Ampicillin-Sulbactam, IPM: Imipenem, TZP: Piperacillin-tazobactam, FEP: Cefepime, CAZ: Ceftazidime; (b) CN: Gentamicin, AK: Amikacin, SXT: Sulfamethoxazole + Trimethoprim, TOB: Tobramycin; (c) DO: Doxycycline, MH: Minocycline, ENR: Enrofloxacin, CIP: Ciprofloxacin]

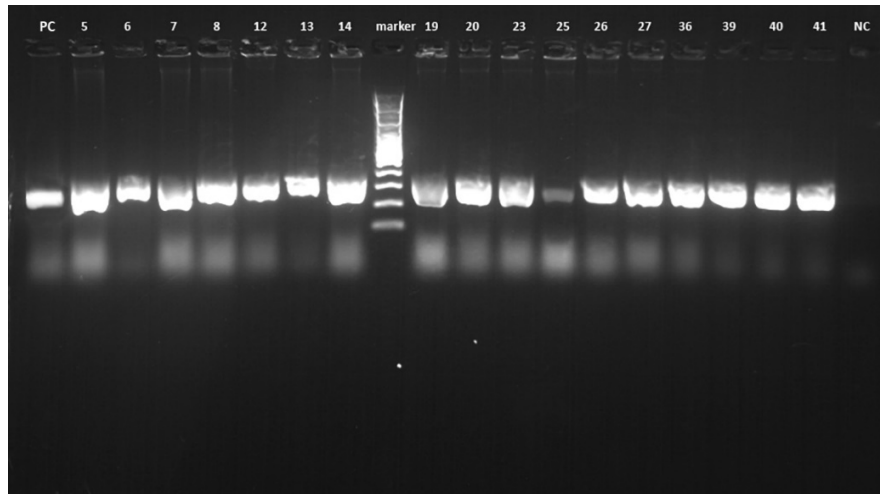

**Figure S5.** Indicative agarose gel electrophoresis image from a selection of samples.

| Suggested eradication measures for veterinary facilities                                                                                                                                                                                                                                                                                                                                                                                                                                                                                                                                                                                                                                                                                                                                                                          |
|-----------------------------------------------------------------------------------------------------------------------------------------------------------------------------------------------------------------------------------------------------------------------------------------------------------------------------------------------------------------------------------------------------------------------------------------------------------------------------------------------------------------------------------------------------------------------------------------------------------------------------------------------------------------------------------------------------------------------------------------------------------------------------------------------------------------------------------|
| <ul style="list-style-type: none"> <li>• The infected animal should be isolated.</li> <li>• Cages should be cleaned, steamed (if possible) and disinfected.</li> <li>• Medical equipment should be dismantled and disinfected thoroughly.</li> <li>• Disinfectants must be used at the recommended concentrations and contact times, since reduced values in these factors have been associated with bacterial survival.</li> <li>• Environmental sampling from surfaces and equipment should be performed (usage of modified sampling techniques could be beneficial).</li> <li>• All the aforementioned processes should be repeated if necessary.</li> <li>• Antibiotics in all hospitalized animals should be administered with caution and only according to preceding culture results and susceptibility testing</li> </ul> |

**Figure S6.** Suggested eradication measures for veterinary facilities.
